# Supplementary figures and images for: Electrospun polyethylene terephthalate (PET) nanofibers as a new adsorbent for micro-solid phase extraction of chromium(vi) in environmental water samples
Source: Royal Society of Chemistry journal article supplement (doi:10.1039/c5ra14788c), 2015-01-01

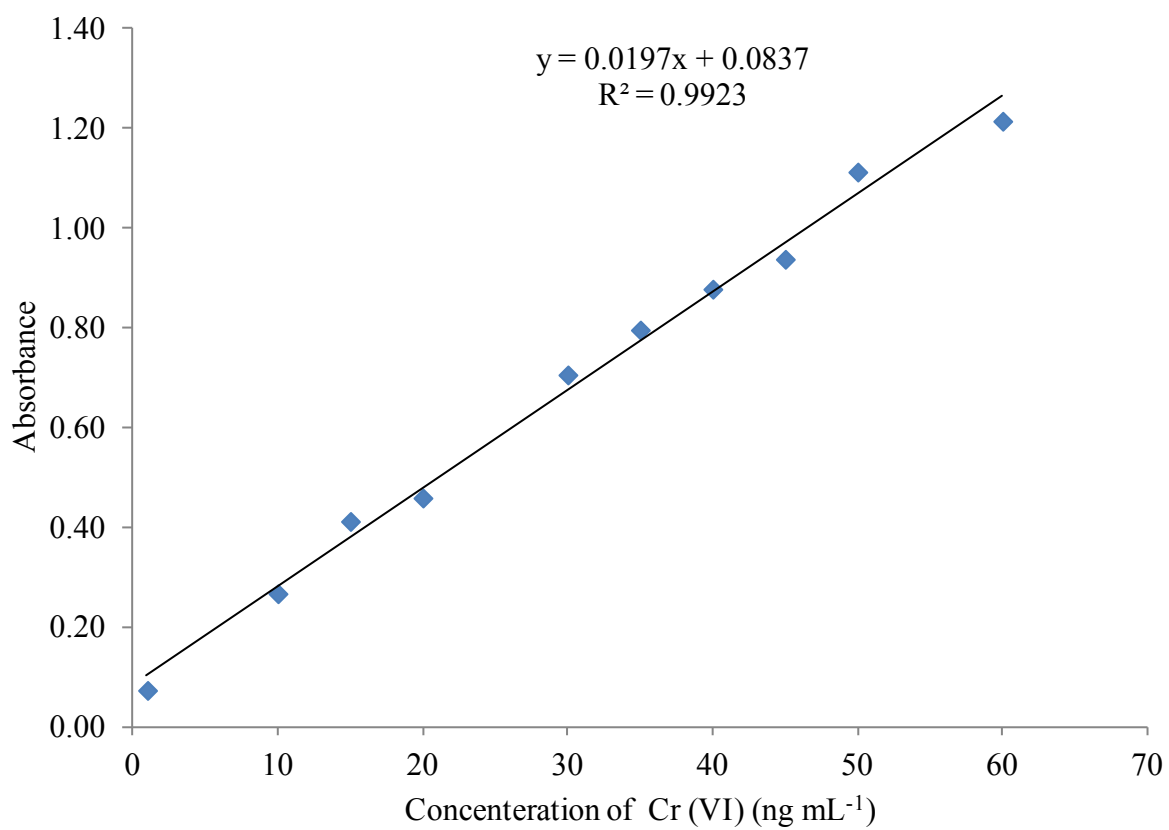

**Fig. S1.** The calibration curve for Cr(VI) under the optimized condition.

Supplement: c5ra14788c1.pdf [file c5ra14788c1.pdf]
